# Supplementary material for: Bijel rheology reveals a 2D colloidal glass wrapped in 3D
Source: Royal Society of Chemistry journal article supplement (doi:10.1039/d2sm00407k), 2022-01-01
Supplement: d2sm00407k1.pdf [file d2sm00407k1.pdf]

Supporting Information for

**Bijel rheology reveals a 2D colloidal glass  
wrapped in 3D**

Herman Ching and Ali Mohraz\*

Department of Chemical and Biomolecular Engineering,  
University of California, Irvine, CA 92697-2580, USA

E-mail: mohraz@uci.edu

## Table of Contents

|                                                                                                                                                  |      |
|--------------------------------------------------------------------------------------------------------------------------------------------------|------|
| <b>Figure S1.</b> Scanning electron microscopy image of silica nanoparticles                                                                     | S3   |
| <b>Figure S2.</b> Scanning electron microscopy image of PHSA-PMMA particles                                                                      | S3   |
| <b>Figure S3.</b> Steady state shear moduli of 14BD/PC bijels prepared with different volume fraction of solids at different temperature         | S4   |
| <b>Figure S4.</b> Capillary potential between particles at the interface of bijels as a function of temperature                                  | S5   |
| <b>Figure S5.</b> Oscillatory frequency sweeps of 14BD/PC bijels prepared with different volume fraction of solids at different temperature      | S6   |
| <b>Figure S6.</b> Oscillatory amplitude sweeps of 14BD/PC bijels prepared with different volume fraction of solids at different temperature      | S6   |
| <b>Figure S7.</b> Small and medium strain frequency sweeps of 14BD/PC prepared with different volume fraction of solids at different temperature | S7-8 |
| <b>Figure S8.</b> Small and medium strain frequency sweeps of 13BD/DOP capillary suspensions                                                     | S9   |

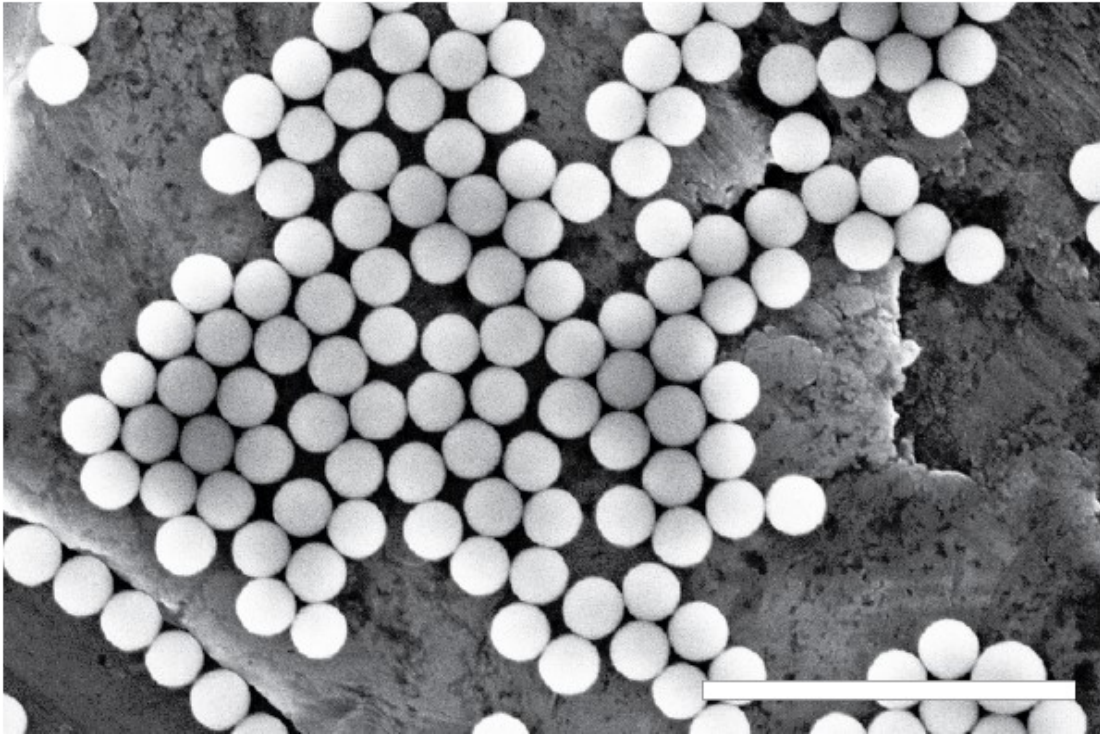

**Fig. S1** A SEM micrograph of the SNPs used in the preparation of 14BD/PC bijels. Scale bar = 2  $\mu\text{m}$ .

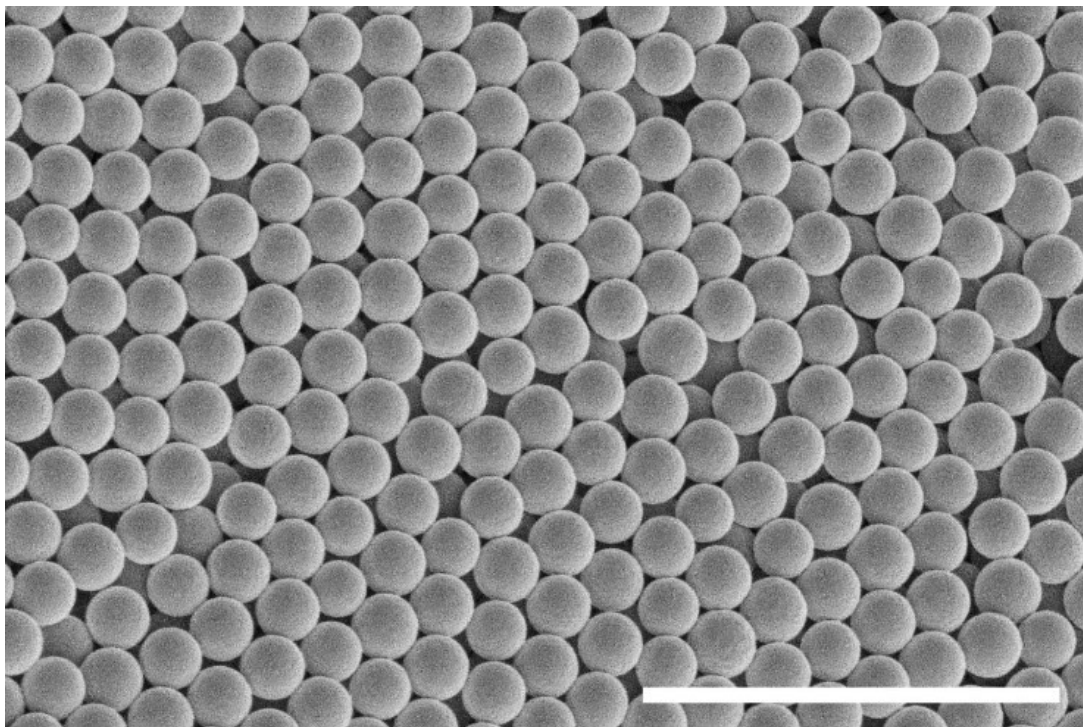

**Fig. S2** A SEM micrograph of the PHSА-PMMA particles used in the preparation of 13BD/DOP capillary suspensions. Scale bar = 10  $\mu\text{m}$ .

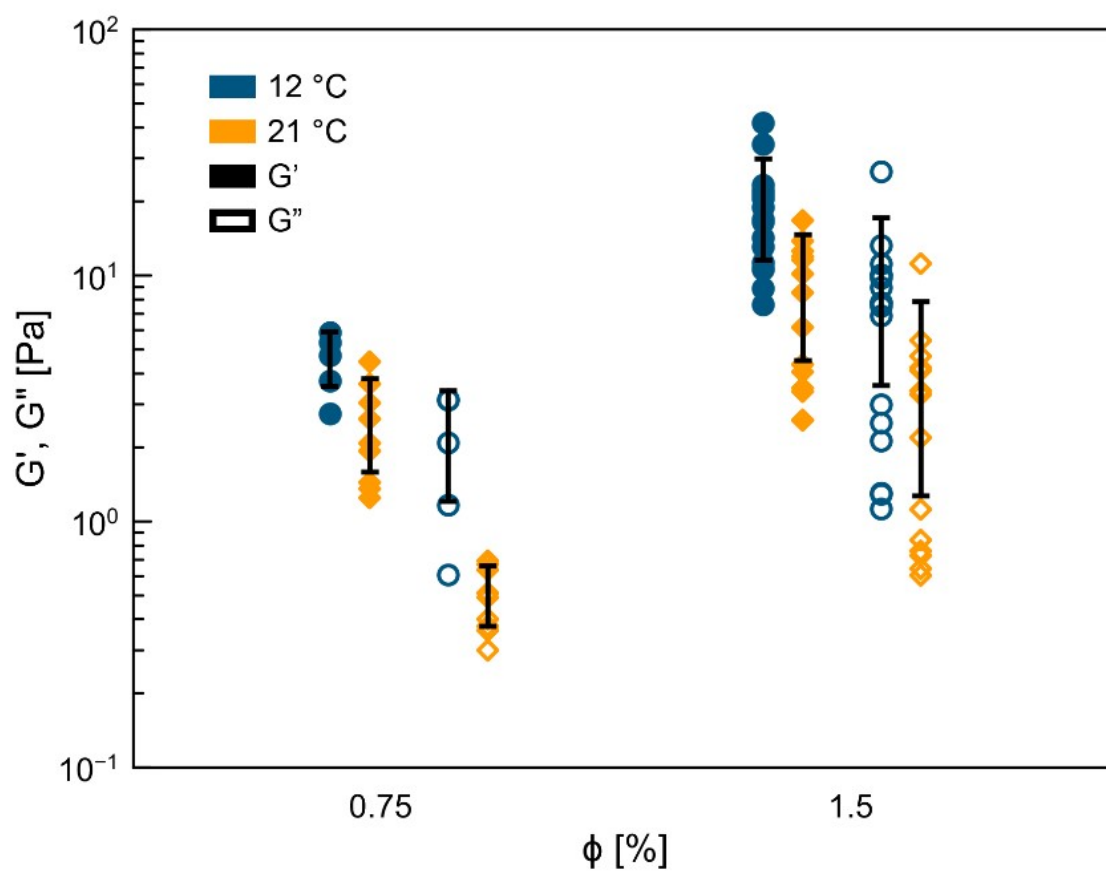

**Fig. S3** Near-steady state  $G'$  (close symbols) and  $G''$  (open symbols) of 14BD/PC bijels with  $\phi_{SNP} = 7.5 \times 10^{-3}$  and  $1.5 \times 10^{-2}$  at 12°C (orange) and 21°C (blue). The samples were measured at  $\gamma = 1.0 \times 10^{-1}\%$  strain and frequency  $\omega = 6.3 \times 10^{-1}$  rad/s after a 2 h long aging period. Error bars represent the relative error ( $N \geq 5$ ).

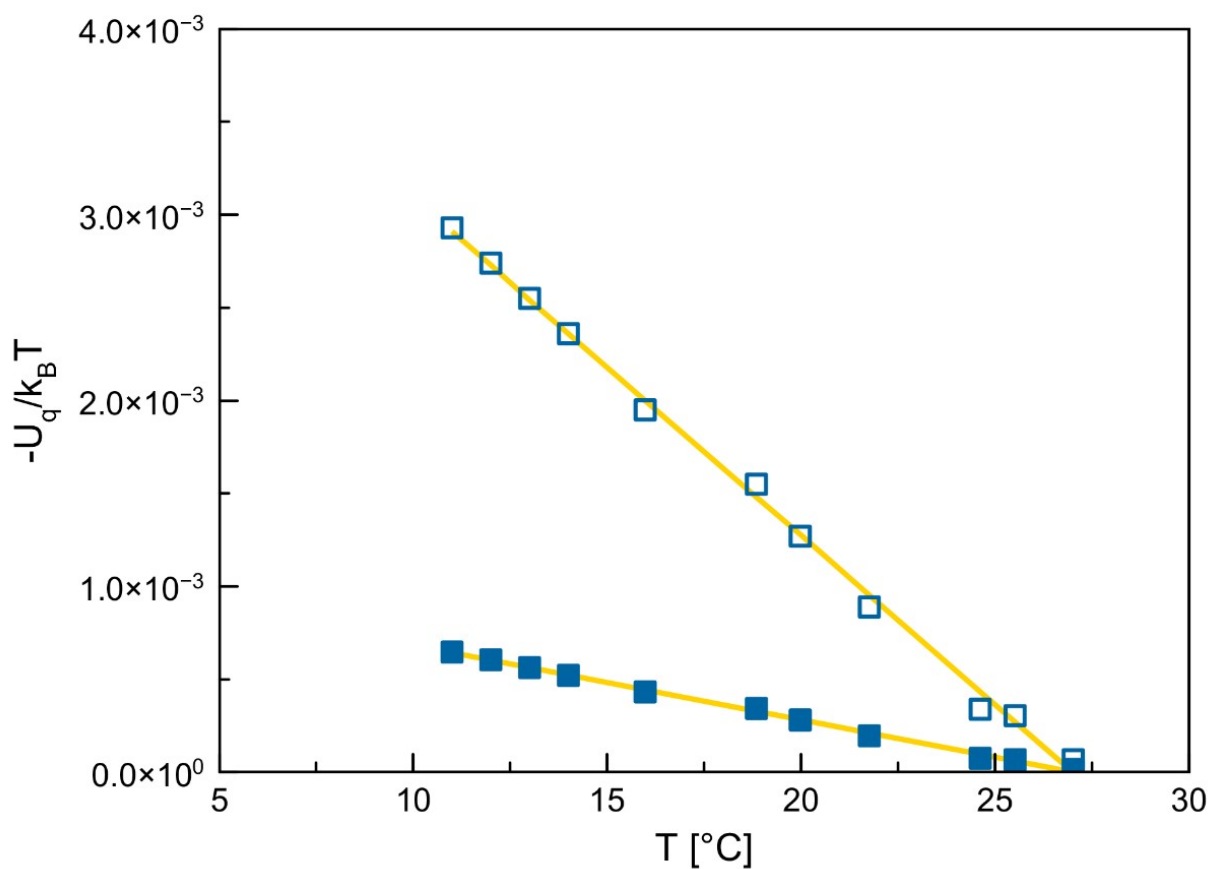

**Fig. S4** Capillary pair-potential ( $U_q$ ) induced by local quadrupolar deformation of an interface with negative Gaussian curvature, plotted as a function of temperature for 14BD/PC bijels comprising  $\phi_{SNP} = 7.5 \times 10^{-3}$  (close symbols) and  $1.5 \times 10^{-2}$  (open symbols). The blue markers present values calculated from the interfacial tension measurements, and the yellow lines are linear fits.

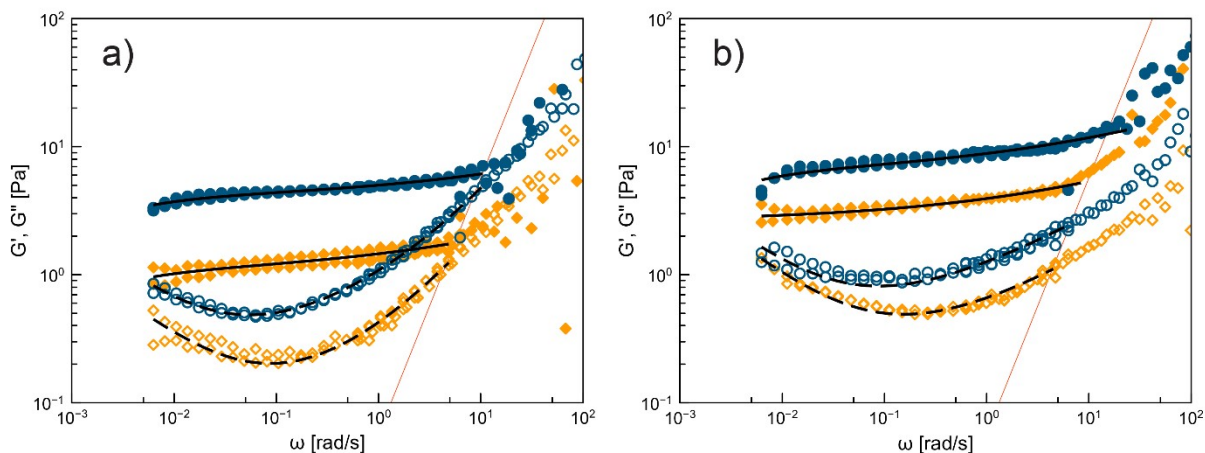

**Fig. S5** Frequency response of 14BD/PC bijels comprising  $\phi_{SNP} = 7.5 \times 10^{-3}$  (a) and  $1.5 \times 10^{-2}$  (b) at  $T = 12$  (blue) and  $21^\circ\text{C}$  (orange).  $G'$  and  $G''$  are marked by open and close symbols, respectively. The solid and dashed lines represent the MCT fits. The red lines indicate the rheometer inertia limit.

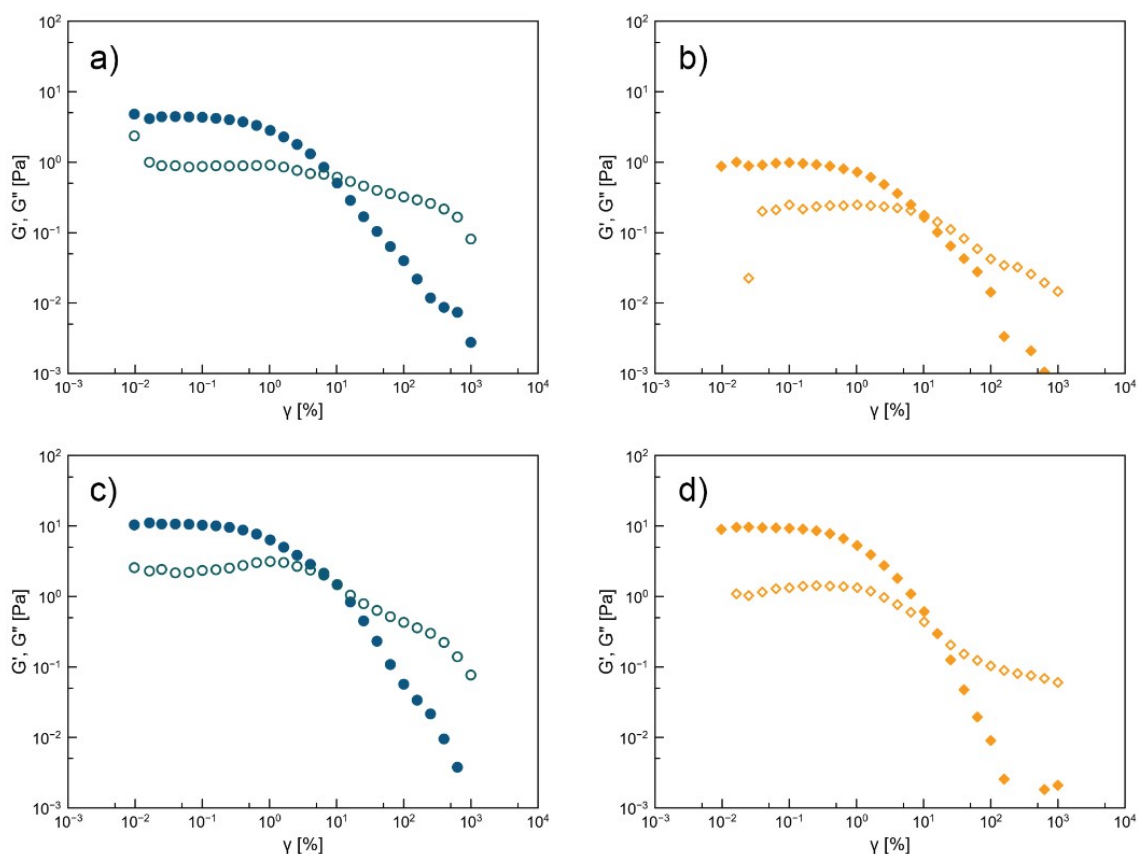

**Fig. S6** Oscillatory amplitude sweeps showcasing the transition of  $G'$  (open symbols) and  $G''$  (close symbols) from linear to non-linear viscoelasticity for 14BD/PC bijels comprising  $\phi_{SNP} = 7.5 \times 10^{-3}$  (a,b) and  $1.5 \times 10^{-2}$  (c,d). The blue and orange symbols represent measurements conducted at  $T = 12$  and  $21^\circ\text{C}$ , respectively.

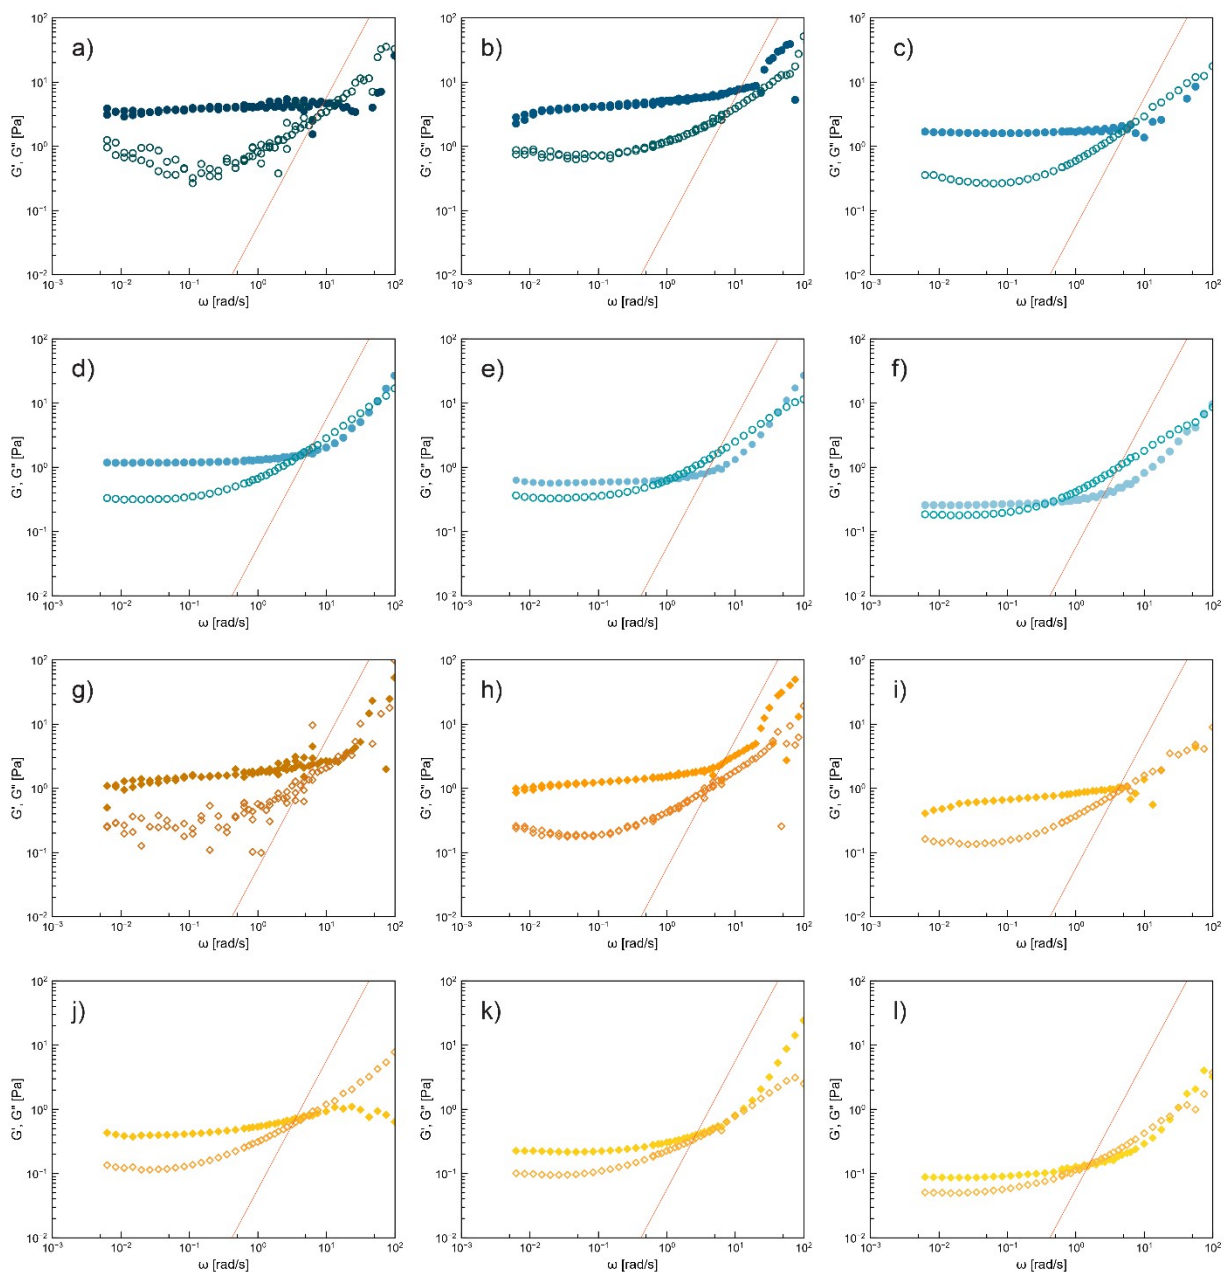

**Fig. S17** Frequency  $\omega$  response of 14BD/PC bijels comprising  $\phi_{SNP} = 7.5 \times 10^{-3}$  (a-l) and  $1.5 \times 10^{-2}$  (m-x) at small and medium strains.  $G'$  and  $G''$  are marked by open and close symbols, respectively. The dark to light colors (or a-f, g-l, m-r, s-x) represent  $1.0 \times 10^{-2}$ ,  $1.0 \times 10^{-1}$ , 1.0, 2.0, 5.0, and 10% strains, respectively. The blue and orange symbols represent measurements at 12 and 21°C, respectively. The red lines indicate the rheometer inertia limit.



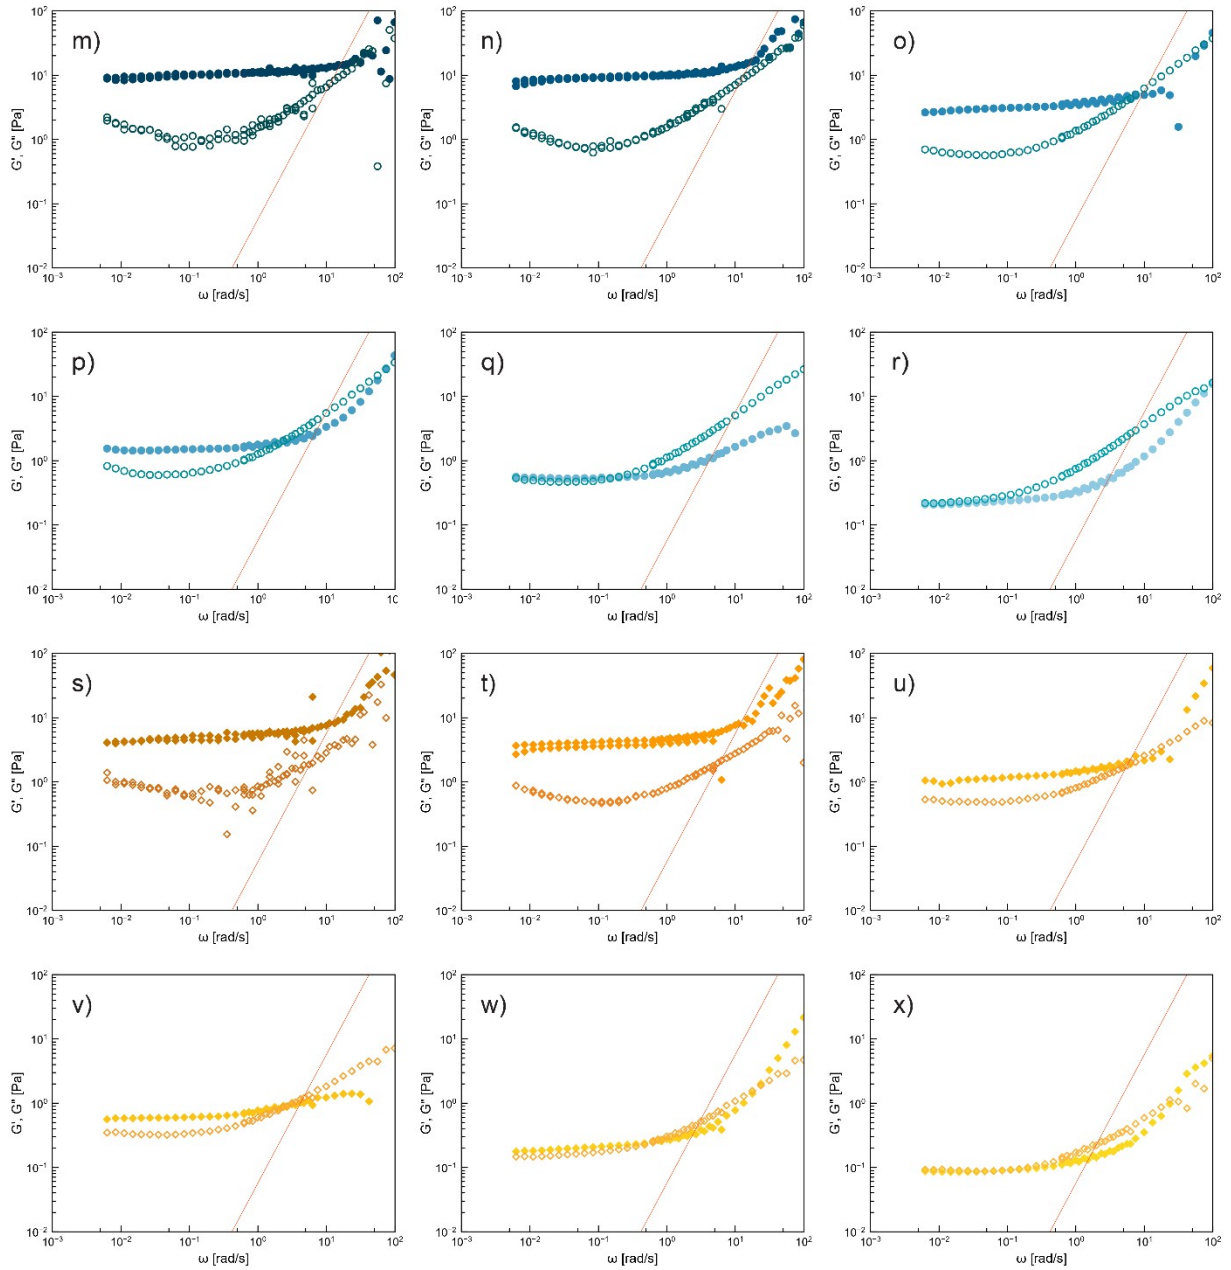

Fig. S17 Continue.



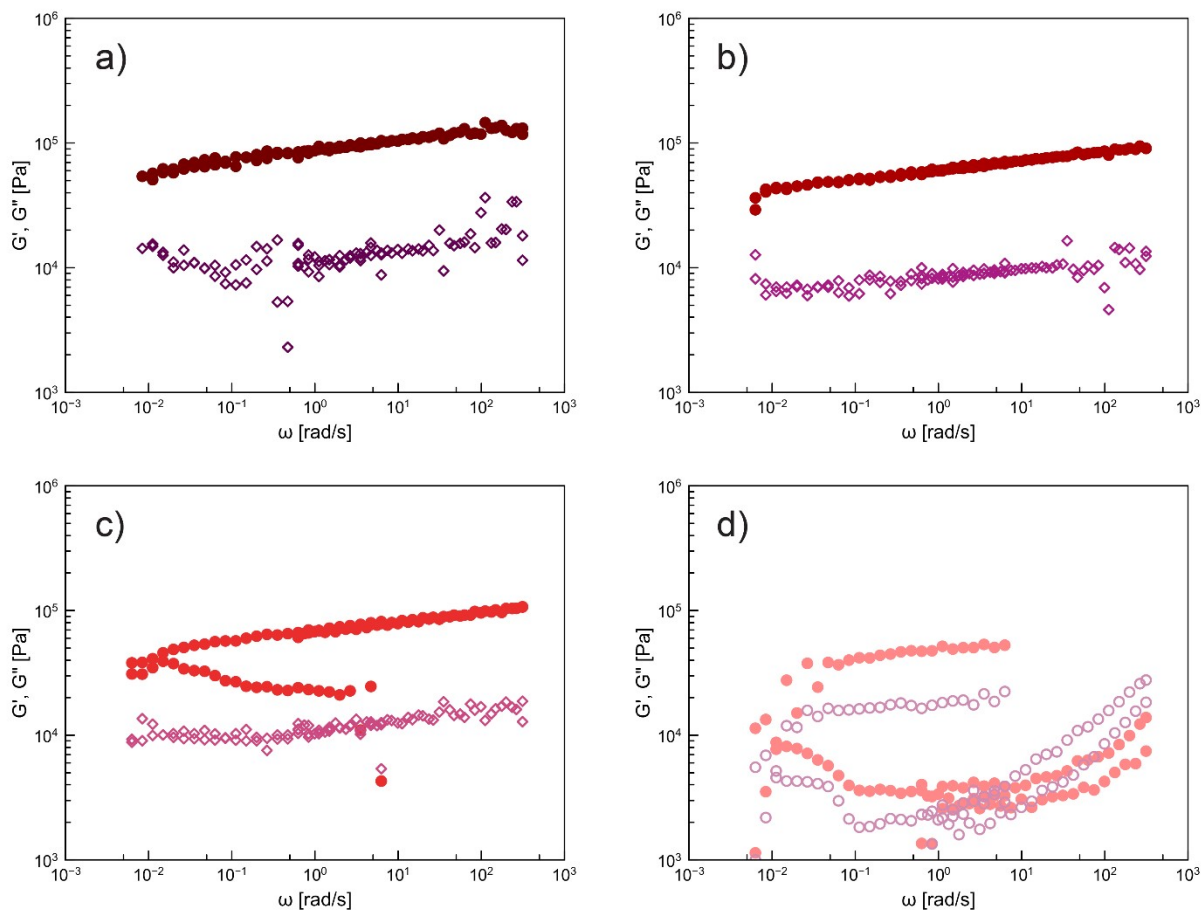

**Fig. S18** Frequency response of 13BD/DOP capillary suspensions comprising  $\phi_{PMMA} = 0.20$  at small and medium strains. The strain amplitude of each frequency sweep is: (a)  $1.0 \times 10^{-2}\%$ , (b)  $2.5 \times 10^{-2}\%$ , (c)  $4.0 \times 10^{-2}\%$ , (d)  $1.0 \times 10^{-1}\%$ .  $G'$  and  $G''$  are marked by open and close symbols, respectively.
